# Supplementary material
Source: publisher figshare collection journal article supplement (https://asha.figshare.com/articles/dataset/_/25799935)
Supplement: Supplementary file 2 [file 1]

**Supplemental Material S3.** Procedural reliability checklist for baseline phase:  
answering questions behavior.

|                                                 |
|-------------------------------------------------|
| <b>Code Name:</b>                               |
| <b>Peer/Experimenter (Circle/Highlight one)</b> |
| <b>Coder's Name:</b>                            |
| <b>Date:</b>                                    |

*Directions: Place a check in the box if the step was completed. Place an X in the box if the step was not completed.*

**Prior to Beginning of Session**

☐ iPad opened to home page on Proloquo2Go

**Probe #1 (How are you?)**

☐ Peer or experimenter starts session by using aided modeling to state "Hi, how are you?"

☐ Peer/experimenter waits 5 s without giving cues

☐ Peer/experimenter selects participant's preferred game/activity

**Probe #2 (Do you like this game?)**

☐ Peer/experimenter uses aided modeling to ask, "Do you like this game?"

☐ Peer/experimenter waits 5 s without giving cues

*Did the participant answer yes or no respond? Go directly to probe labeled probe #3 or 4.* ☐

*Did the participant answer no? See steps below labeled option for probe 3.* ☐

**Option for Probe #3**

☐ Peer/experimenter selects another preferred activity.

☐ Peer/experimenter uses aided modeling to ask, "Do you like this game?"

☐ Peer/experimenter waits 5 s without giving cues

**Probe #3 or 4**

*Highlight question asked*

☐ Peer/experimenter uses aided modeling to ask, "Are you having fun?" or "Is it my turn?"

☐ Peer/experimenter waits 5 s without giving cues

**Probe #4 or 5**

*Highlight question asked*

☐ Peer/experimenter uses aided modeling to ask, "Are you having fun?" or "Is it my turn?"

☐ Peer/experimenter waits 5 s without giving cues

**Probe #5 (if needed)**

*Highlight question asked*

☐ Peer/experimenter uses aided modeling to ask, "Are you having fun?" or "Is it my turn?"

☐ Peer/experimenter waits 5 s without giving cues

**End of Session**

☐ Session lasted 20-30 minutes

☐ No cues were given for the duration of the sessions

☐ Five probes were given targeting answering questions
