# Supplementary material
Source: publisher figshare collection journal article supplement (https://asha.figshare.com/articles/dataset/_/25799935)
Supplement: Supplementary file 3 [file 1]

## **Supplemental Material S2.** Procedural reliability checklist for baseline phase: initiating requests behavior.

|                                                 |
|-------------------------------------------------|
| <b>Code Name:</b>                               |
| <b>Peer/Experimenter (Circle/Highlight one)</b> |
| <b>Coder's Name:</b>                            |
| <b>Date:</b>                                    |

*Directions: Place a check in the box if the step was completed. Place an X in the box if the step was not completed.*

### **Prior to Beginning of Session**

☐ iPad opened to home page on Proloquo2Go

### **Session Intro**

☐ Peer or experimenter starts session by using aided modeling to state, "I want to play a game"

☐ Peer/experimenter selects participant's preferred game/activity

### **Probe #1**

☐ Peer/experimenter takes one turn

☐ Peer/experimenter waits 5 s without giving cues

☐ Peer/experimenter gives participant turn irrespective if the peer responds correct/incorrect

☐ Peer/experimenter uses aided modeling to state, "I want ACTION"

### **Probe #2**

☐ Peer/experimenter takes one turn

☐ Peer/experimenter waits 5 s without giving cues

☐ Peer/experimenter gives participant turn irrespective if the peer responds correct/incorrect

☐ Peer/experimenter uses aided modeling to state, "I want ACTION"

### **Probe #3**

☐ Peer/experimenter takes one turn

☐ Peer/experimenter waits 5 s without giving cues

☐ Peer/experimenter gives participant turn irrespective if the peer responds correct/incorrect

☐ Peer/experimenter uses aided modeling to state, "I want ACTION"

### **Probe #4**

☐ Peer/experimenter takes one turn

☐ Peer/experimenter waits 5 s without giving cues

- ☐ Peer/experimenter gives participant turn irrespective if the peer responds correct/incorrect
- ☐ Peer/experimenter uses aided modeling to state, "I want ACTION"

**Probe #5**

- ☐ Peer/experimenter takes one turn
- ☐ Peer/experimenter waits 5 s without giving cues
- ☐ Peer/experimenter gives participant turn irrespective if the peer responds correct/incorrect
- ☐ Peer/experimenter uses aided modeling to state, "I want ACTION"

**End of Session**

- ☐ No cues were given for the duration of the sessions
