# Supplementary material
Source: publisher figshare collection journal article supplement (https://asha.figshare.com/articles/dataset/_/25799935)
Supplement: Supplementary file 4 [file 1]

**Supplemental Material S7.** Procedural reliability checklist for intervention phase: commenting behavior.

|                      |
|----------------------|
| <b>Code Name:</b>    |
| <b>Coder's Name:</b> |
| <b>Date:</b>         |

*Directions: Place a check in the box if the step was completed. Place an X in the box if the step was not completed.*

**Prior to Beginning of Session**

- ☐ iPad opened to home page on Proloquo2Go
- ☐ Peer or experimenter starts session by using aided modeling to state, "Let's play a game"
- ☐ Peer/experimenter selects participant's preferred game/activity

**Probe #1**

- ☐ Peer/experimenter takes a turn
- ☐ Peer/experimenter waits 5 s between turns without giving cues.

**Probe #2**

- ☐ Peer/experimenter takes a turn
- ☐ Peer/experimenter waits 5 s between turns without giving cues.

**Probe #3**

- ☐ Peer/experimenter takes a turn
- ☐ Peer/experimenter waits 5 s between turns without giving cues.

**Probe #4**

- ☐ Peer/experimenter takes a turn
- ☐ Peer/experimenter waits 5 s between turns without giving cues.

**Probe #5**

- ☐ Peer/experimenter takes a turn
- ☐ Peer/experimenter waits 5 s between turns without giving cues.

**End of Session**

- ☐ Five probes were given targeting commenting
- ☐ Systematic instruction was given accurately
- ☐ Error correction was given accurately



Supplemental material, Chavers Edgar et al., "Effects of an Augmentative and Alternative Communication Intervention Package on Socio-Communicative Behaviors Between Minimally Speaking Autistic Children and Their Peers," *AJSLP*,  
[https://doi.org/10.1044/2024\\_AJSLP-23-00313](https://doi.org/10.1044/2024_AJSLP-23-00313)
