# Supplementary material
Source: publisher figshare collection journal article supplement (https://asha.figshare.com/articles/dataset/_/25799935)
Supplement: Supplementary file 5 [file 1]

**Supplemental Material S10.** Procedural reliability checklist for generalization phase: commenting behavior.

|                                                 |
|-------------------------------------------------|
| <b>Code Name:</b>                               |
| <b>Peer/Experimenter (Circle/Highlight one)</b> |
| <b>Coder's Name:</b>                            |
| <b>Date:</b>                                    |

*Directions: Place a check in the box if the step was completed. Place an X in the box if the step was not completed.*

**Prior to Beginning of Session**

- ☐ iPad opened to home page on Proloquo2Go
- ☐ Peer starts session by using aided modeling to state, "Let's play a game"
- ☐ Peer selects participant's preferred game/activity

**Probe #1**

- ☐ Peer takes a turn
- ☐ Peer waits 5 s between turns without giving cues.

**Probe #2**

- ☐ Peer takes a turn
- ☐ Peer waits 5 s between turns without giving cues.

**Probe #3**

- ☐ Peer takes a turn
- ☐ Peer waits 5 s between turns without giving cues.

**Probe #4**

- ☐ Peer takes a turn
- ☐ Peer waits 5 s between turns without giving cues.

**Probe #5**

- ☐ Peer takes a turn
- ☐ Peer waits 5 s between turns without giving cues.

**End of Session**

- ☐ Session lasted 20-30 minutes
- ☐ No cues were given for the duration of the sessions
- ☐ Five probes were given targeting commenting
